# Supplementary material
Source: PubMed Central journal article supplement (PMC6136041)
Supplement: jamaophthalmol-136-779-s001.pdf [file jamaophthalmol-136-779-s001.pdf]

## Supplementary Online Content

De Moraes CG, Mansouri K, Liebmann JM, Ritch R; Triggerfish Consortium. Association between 24-hour intraocular pressure monitored with contact lens sensor and visual field progression in glaucoma. *JAMA Ophthalmol*. Published online May 24, 2018. doi:10.1001/jamaophthalmol.2018.1746

**eAppendix 1.** Institutional Review Boards

**eAppendix 2.** Triggerfish Parameters Tested in the Present Study

**eAppendix 3.** Principal Component Analysis

**eFigure 1.** Flowchart Showing the Reasons for Excluding / Including Patients in the Present Study

**eFigure 2.** Twenty-four Hour Contact Lens Sensor Output

**eFigure 3.** Scree Plot Showing the Relationship Between Eigenvalues and the Number of Components

**eTable 1.** Factors Loadings From Principal Component Analysis With 14 Components

**eTable 2.** Spearman's Correlation Coefficients (Top Row) and P-Values (Bottom Row)

**eTable 3.** Multivariable Linear Regression Analysis of Mean Goldmann Intraocular Pressure and Covariates

**eTable 4.** Univariable Linear Regression Analysis of Individual Principal Components (PCs) Derived From Contact Lens Sensor Parameters

**Table 5.** Multivariable Linear Regression Analysis With Stepwise Backward Selection of Principal Components Derived From Contact Lens Parameters ( $P < 0.20$  in Univariable Models) and the Set of Covariates

**eTable 6.** Multivariable Linear Regression Analysis With Covariates Included as Confounders

**eTable 7.** Univariable Linear Regression Analysis of Individual Contact Lens Sensor Parameters (N=55)

**eTable 8.** Multivariable Logistic Regression Analysis With Stepwise Backward Selection of Contact Lens Parameters ( $P < 0.20$  in Univariable Models) and the Set of Covariates

**eTable 9.** Multivariable Logistic Regression Analysis With Mean Goldmann Intraocular Pressure and the Set of Covariates

**eTable 10.** Univariable Logistic Regression Analysis With Each Principal Component Derived From the Contact Lens Parameters

**eTable 11.** Multivariable logistic Regression Analysis With Stepwise Backward Selection of Principal Components Derived From the Contact Lens Parameters ( $P < 0.20$  in Univariable Models) and the Set of Covariates

This supplementary material has been provided by the authors to give readers additional information about their work.



## **eAppendix 1. Institutional Review Boards**

The sites where an IRB/ Ethics Committee approved their studies are:

- Landesärztekammer Rheinland-Pfalz Ethik Kommission
- Comité Ético de Investigación Clínica de la Fundación Jiménez Díaz
- Comité d'éthique local de l'hôpital d'instruction des armées Desgenettes
- Research Ethics Committee Universiti Kebangsaan Malaysia

All other data were obtained from registries, i.e., existing databases with de-identified clinical data shared for this study.

This type of data does not require IRB/EC approval in the countries of origin.

## eAppendix 2. Triggerfish Parameters Tested In the Present Study

|                                                        |
|--------------------------------------------------------|
| Number of large peaks (24 hours)                       |
| Number of large peaks (sleep)                          |
| Number of large peaks (awake)                          |
| Number of brief peaks (24 hours)                       |
| Number of brief peaks (sleep)                          |
| Number of brief peaks (awake)                          |
| Mean peak ratio (24 hours)                             |
| Mean peak ratio (sleep)                                |
| Mean peak ratio (awake)                                |
| Wake-to-sleep slope                                    |
| Amplitude of the cosine curve                          |
| Area under curve (sleep)                               |
| Variability from mean (24 hours)                       |
| Variability from mean (sleep)                          |
| Variability from mean (awake)                          |
| Variability from smooth (24 hours)                     |
| Variability from smooth (sleep)                        |
| Variability from smooth (awake)                        |
| All bursts amplitude mean                              |
| All bursts amplitude standard deviation                |
| All bursts ocular pulse amplitude mean                 |
| All bursts ocular pulse amplitude standard deviation   |
| All bursts ocular pulse frequency mean                 |
| All bursts ocular pulse frequency standard deviation   |
| All bursts peak count mean                             |
| All bursts peak count standard deviation               |
| All bursts standard deviation mean                     |
| Day 1 bursts amplitude mean                            |
| Day 1 bursts amplitude standard deviation              |
| Day 1 bursts peak count mean                           |
| Day 1 bursts peak count standard deviation             |
| Day 1 bursts standard deviation mean                   |
| Night bursts amplitude mean                            |
| Night bursts amplitude standard deviation              |
| Night bursts ocular pulse amplitude mean               |
| Night bursts ocular pulse amplitude standard deviation |
| Night bursts ocular pulse frequency mean               |
| Night bursts ocular pulse frequency standard deviation |
| Night bursts peak count mean                           |
| Night bursts peak count standard deviation             |
| Night bursts standard deviation mean                   |
| Ocular pulse amplitude maximum                         |

|                                                 |
|-------------------------------------------------|
| Ocular pulse amplitude minimum                  |
| Ocular pulse amplitude night amplitude smoothed |
| Ocular pulse amplitude night delta              |
| Ocular pulse amplitude night delta smoothed     |
| Ocular pulse amplitude night noise              |
| Ocular pulse amplitude standard deviation       |
| Cosinor ocular pulse amplitude acrophase        |
| Cosinor ocular pulse amplitude amplitude        |
| Cosinor ocular pulse amplitude mesor            |
| Tojo                                            |
| Standard deviation                              |
| Amplitude                                       |
| Level sleep start before 00h                    |

## eAppendix 2. Triggerfish Parameters Tested In the Present Study (continued)

### Triggerfish parameters definition

#### Full curve:

Peaks: A peak is defined as a local maximum point in the smoothed Triggerfish function. The calculation of the number of peaks occurs as follows: each trough is noted as the start of a peak. The increase in Triggerfish value (mVeq) from the preceding trough to the local maximum is termed the height. The time elapse (s) from the trough to the local maximum is termed "Time to Peak." The time interval between the trough immediately before the peak and immediately after is the "Peak Width," while "Peak Height" is the length of the perpendicular line from the trough preceding the peak to the peak itself.

Large Peaks are defined as peaks with a height of 90mVeq or greater. This distinction differentiates between peaks that may be very small and frequent, but with little clinical interpretation, and those that are more clinically meaningful. The choice of 90mVeq is based on the Height at which there appears to be a large separation between healthy and glaucoma subjects.

Brief peaks are defined as peaks which occur in a short span of time. A brief peak is a peak in which the time from trough to peak is no more than 30 minutes. This distinction is meant to highlight potentially "high risk" peaks which may be missed on a local IOP reading (such as GAT), but which can be recognized on a Triggerfish curve.

Mean Peak Ratio: for each peak, Peak Ratio is calculated to encompass both the peak height and time to peak values.

$$\text{Peak Ratio} = \text{Peak Height} / \text{Time to Peak}$$

A peak will have a high peak ratio if the Height is great or the Time to Peak is small or both. This ratio highlights those peaks that are more likely to be clinically significant.

Wake-to-Sleep slope: defined as the slope of the linear regression line that is fitted to the data between one hour before sleep to one hour after sleep. Clinically, this slope is expected to be positive, as IOP tends to rise when one is lying down.

Amplitude of the Cosine Curve: difference between the maximum and minimum values of the cosine-fit curve.

Auc Sleep: Area under the curve during sleep period.

Variability from the mean: variability around the mean value of all raw (not smoothed) Triggerfish measurements.

Variability from smooth: mean of difference between smoothed curve and original curve.

For each of the above-described parameters, we calculated their values during 24-hours, during sleep, and while awake.

### **In burst data:**

We compute descriptive statistics of parameters computed on in-burst data. Those in-burst parameters are the following:

Amplitude: The amplitude of the signal over the 30 seconds ( $\max(\text{Triggerfish}) - \min(\text{Triggerfish})$ )

Std: The standard deviation of the signal over the 30 seconds

Opa: The ocular pulse amplitude

Opf: The ocular pulse frequency

Peak Count: The number of brief peaks in the burst

Then for all those parameters above, we compute the distribution among all bursts and we compute the mean and the standard deviation to produce the following parameters:

All Bursts Amplitude mean

All Bursts Amplitude standard deviation

All Bursts standard deviation mean

All Bursts OPA mean

All Bursts OPA standard deviation

All Bursts OPF mean

All Bursts OPF standard deviation

All Bursts Peak Count mean

All Bursts Peak Count standard deviation

### **Other parameters:**

Tojo: This feature has been proposed by professor Tojo (Tojo N, et al. Graefes Arch Clin Exp Ophthalmol. 2014;252(9):1463-8.), defined as:  $\text{Max}(\text{Triggerfish burst curve during sleep}) - \text{Min}(\text{Triggerfish burst curve during sleep})$ . By Triggerfish Burst Curve we mean the curve composed of the 288 medians from the actual curve.

Standard deviation: the standard deviation of the Triggerfish burst curve

Amplitude: the amplitude of the Triggerfish burst curve, defined as:  $\text{Max}(\text{Triggerfish burst curve}) - \text{Min}(\text{Triggerfish burst curve})$

Level sleep start: defined as the median of the Triggerfish burst curve during the hour preceding sleep start – Triggerfish value of first burst considered as asleep

### **eAppendix 3. Principal Component Analysis**

The 55 contact lens sensor (CLS) parameters are intrinsically correlated to one another, which could potentially lead to the undesired effects of collinearity in the analyses.<sup>16</sup> Moreover, testing the relationship between each parameter and the rate of visual field progression would require multiple testing, which could lead to inflated type I error rates.

To minimize these issues, we performed principal component analysis (PCA). In brief, PCA is a technique for reducing the dimensionality of a dataset, increasing interpretability but at the same time minimizing information loss. It does so by creating new uncorrelated variables that successively maximize variance. This means that preserving as much variability as possible translates into finding new variables that are linear functions of those in the original dataset that successively maximize variance and that are uncorrelated with each other.

The total number of principal components (PCs) can range from 1 to N, where N is the total number of parameters. To determine the smallest number of PCs that can still explain most of the variance of the construct, the leading eigenvectors from the eigen decomposition of the correlation matrix of the variables describe a series of uncorrelated linear combinations of the variables that contain most of the variance. We selected this number using the Kaiser-Guttman criterion, that is, based upon eigenvectors equal to or greater than 1.0 as the lower bound for the number of factors. The Table shows the total number of PCs (N=55) and their respective eigenvalues. Based upon the Kaiser-Guttman criterion and the Scree Plot (**eFigure 3**), 14 PCs explained about 84% of the total variance of the CLS output. This means that 16% of the variance remained unexplained by the combined 14 PCs. Then, the predicted score of each PC (PC1 to PC14) was calculated based upon their eigenvectors and normalized value of each parameter (i.e.: by subtracting their mean and dividing by their standard deviation, SD).



**eFigure 1.** Flowchart Showing the Reasons for Excluding / Including Patients in the Present Study. Please note that eyes could have been excluded for more than one reason, which is why the sum of each criterion is greater than the total number of eyes excluded.

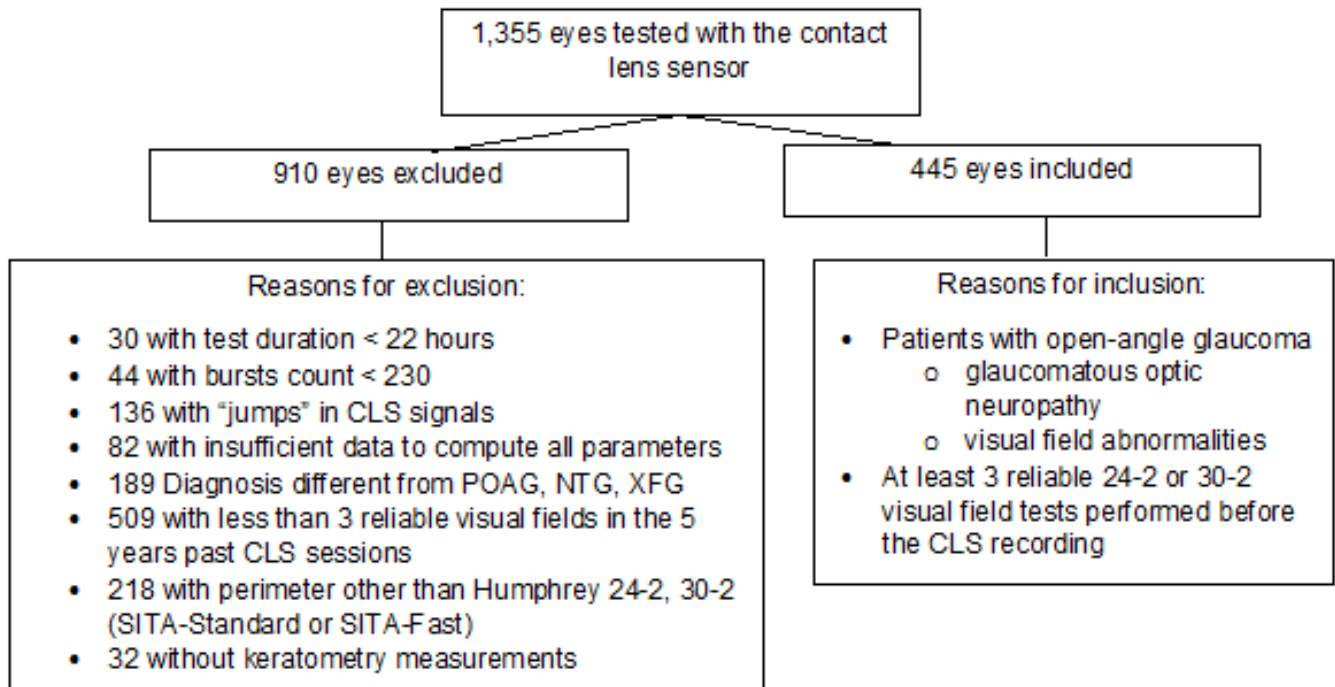

## eFigure 2. Twenty-four Hour Contact Lens Sensor Output

A, Output expressed in mVeq. B, Ocular pulse amplitude signals are isolated from the output.

A)

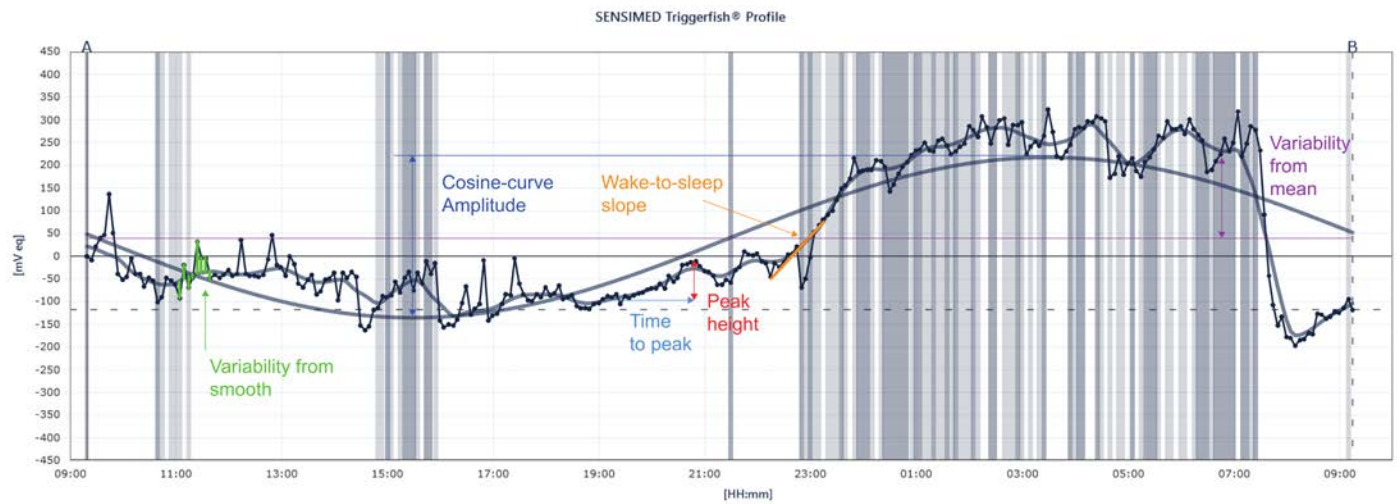

B)

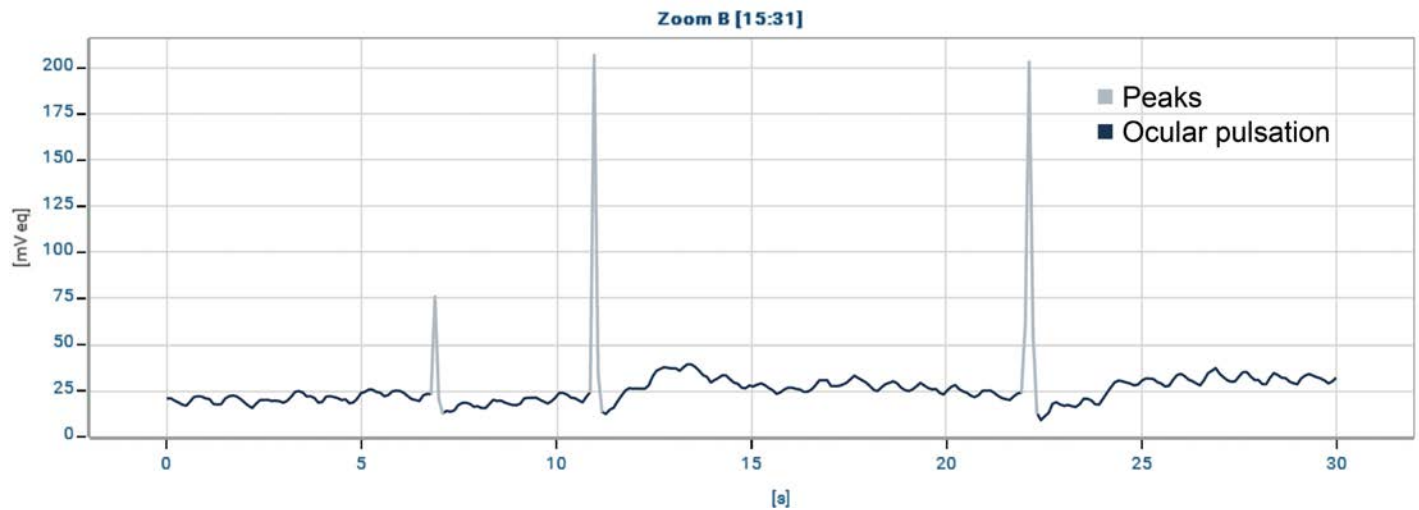

eFigure 3. Scree Plot Showing the Relationship Between Eigenvalues and the Number of Components

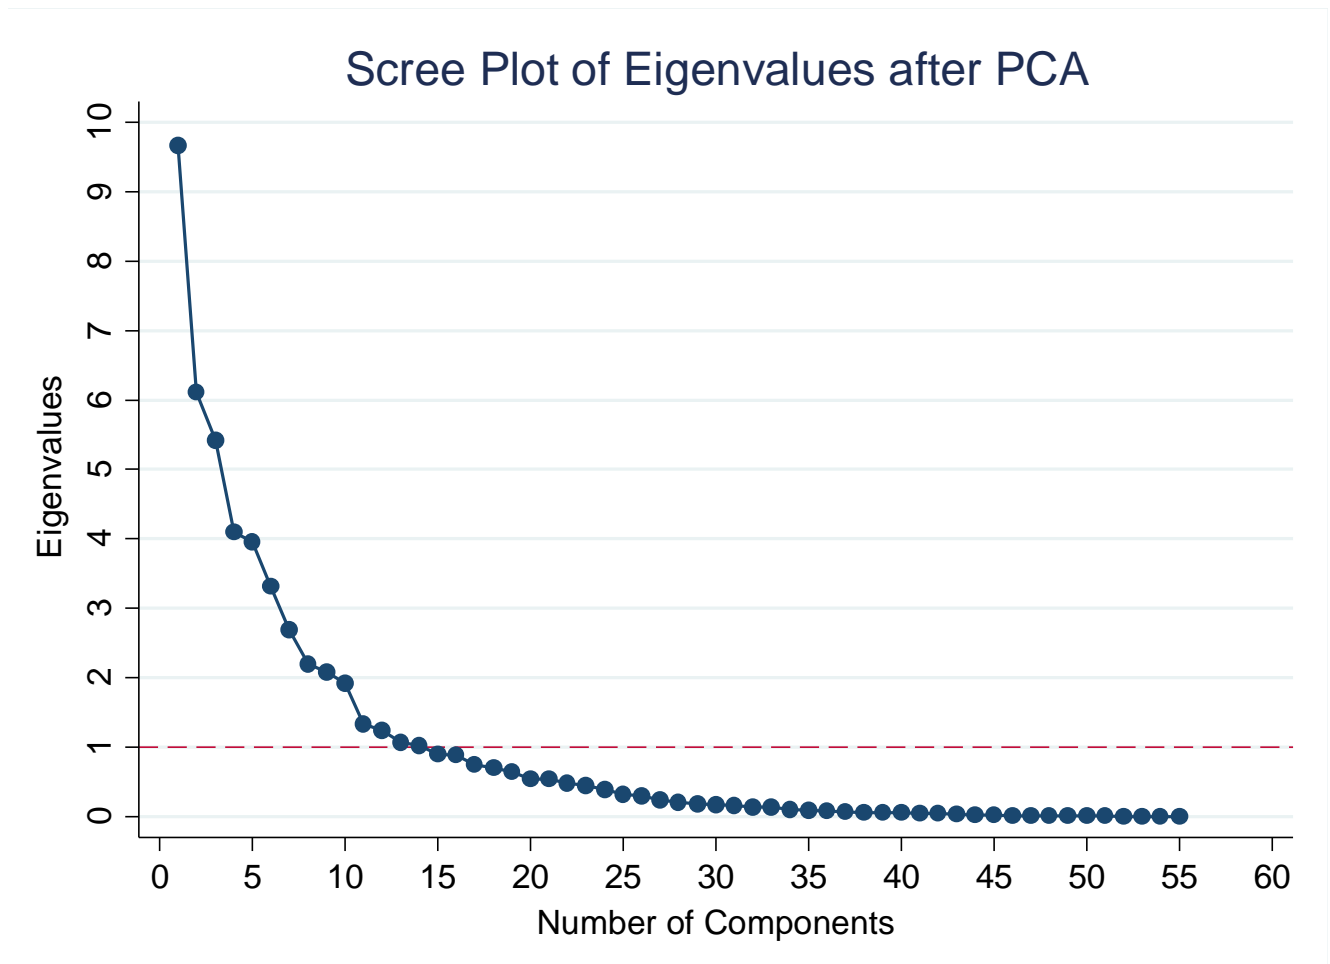

**eTable 1. Factors Loadings From Principal Component Analysis With 14 Components**

| Variable     | Comp1  | Comp2  | Comp3  | Comp4  | Comp5  | Comp6  | Comp7  | Comp8  | Comp9  | Comp10 | Comp11 | Comp12 | Comp13 | Comp14 |
|--------------|--------|--------|--------|--------|--------|--------|--------|--------|--------|--------|--------|--------|--------|--------|
| nlpeaks24h-r | 0.039  | 0.089  | 0.011  | 0.208  | 0.285  | 0.146  | 0.104  | -0.227 | 0.055  | -0.198 | 0.091  | 0.081  | -0.189 | -0.037 |
| nlpeakssleep | 0.036  | 0.052  | -0.002 | 0.111  | 0.230  | 0.159  | 0.079  | -0.158 | -0.020 | -0.164 | 0.069  | 0.028  | -0.172 | -0.003 |
| nlpeakswake  | 0.029  | 0.087  | 0.019  | 0.209  | 0.245  | 0.110  | 0.093  | -0.214 | 0.081  | -0.178 | 0.083  | 0.097  | -0.159 | -0.043 |
| nbpeaks24h-r | 0.117  | 0.226  | 0.101  | 0.067  | 0.163  | -0.114 | 0.098  | 0.046  | -0.155 | 0.056  | -0.050 | 0.037  | 0.227  | 0.080  |
| nbpeakssleep | 0.047  | 0.161  | 0.094  | 0.128  | 0.161  | 0.009  | -0.292 | -0.038 | 0.056  | 0.002  | -0.163 | -0.027 | 0.130  | -0.014 |
| nbpeakswake  | 0.102  | 0.138  | 0.055  | 0.017  | 0.149  | -0.127 | 0.280  | 0.143  | -0.202 | 0.101  | 0.070  | -0.012 | 0.154  | 0.091  |
| meanpeakra-r | 0.140  | 0.201  | 0.084  | 0.099  | 0.268  | -0.040 | 0.146  | -0.003 | -0.064 | -0.001 | -0.055 | 0.026  | 0.107  | 0.025  |
| meanpeakra-p | 0.109  | 0.140  | 0.091  | 0.139  | 0.202  | 0.076  | -0.120 | -0.050 | 0.043  | 0.000  | -0.206 | 0.014  | 0.146  | -0.298 |
| meanpeakra-e | 0.112  | 0.190  | 0.067  | 0.073  | 0.253  | -0.078 | 0.211  | 0.039  | -0.081 | 0.004  | 0.058  | -0.014 | 0.059  | 0.145  |
| waketoslee-e | 0.016  | 0.071  | -0.060 | -0.062 | -0.218 | 0.078  | 0.165  | -0.264 | 0.031  | -0.149 | -0.279 | 0.342  | 0.243  | 0.089  |
| amplitudeo-e | 0.066  | 0.282  | -0.057 | -0.036 | -0.272 | 0.032  | 0.097  | -0.078 | -0.036 | -0.019 | 0.073  | -0.049 | -0.136 | -0.066 |
| aucsleep     | 0.002  | 0.245  | 0.010  | 0.066  | -0.107 | -0.055 | -0.269 | -0.106 | 0.125  | 0.035  | -0.052 | -0.077 | 0.006  | 0.267  |
| varfrommea-r | 0.079  | 0.303  | -0.040 | -0.035 | -0.256 | 0.018  | 0.102  | -0.055 | -0.033 | -0.020 | 0.064  | -0.041 | -0.116 | -0.073 |
| varfrommea-p | 0.040  | 0.236  | 0.061  | 0.079  | -0.025 | -0.064 | -0.367 | -0.027 | 0.164  | -0.033 | -0.083 | -0.058 | 0.086  | 0.080  |
| varfrommea-e | 0.091  | 0.267  | -0.039 | -0.026 | -0.207 | -0.006 | 0.119  | 0.018  | -0.055 | 0.096  | 0.084  | -0.123 | -0.128 | -0.056 |
| varfromsmo-r | 0.111  | 0.014  | 0.189  | -0.171 | 0.071  | -0.242 | 0.013  | 0.233  | -0.072 | 0.086  | -0.109 | 0.215  | -0.072 | 0.013  |
| varfromsmo-p | 0.102  | -0.008 | 0.156  | -0.189 | 0.018  | -0.006 | -0.148 | 0.121  | -0.095 | 0.070  | -0.241 | 0.288  | -0.137 | -0.328 |
| varfromsmo-e | 0.092  | 0.029  | 0.158  | -0.129 | 0.078  | -0.286 | 0.043  | 0.237  | -0.048 | 0.076  | -0.033 | 0.138  | -0.036 | 0.169  |
| allburstsa-n | 0.090  | -0.126 | 0.316  | -0.038 | -0.083 | -0.047 | 0.096  | -0.193 | 0.077  | 0.015  | 0.039  | -0.045 | -0.105 | 0.047  |
| allburstsa-d | 0.069  | -0.065 | 0.328  | -0.074 | -0.020 | -0.070 | 0.036  | -0.245 | 0.082  | 0.073  | 0.111  | -0.126 | 0.047  | -0.127 |
| allbur-amean | 0.259  | -0.075 | -0.154 | -0.064 | 0.047  | 0.017  | 0.057  | -0.048 | 0.071  | 0.057  | -0.168 | -0.139 | -0.016 | 0.125  |
| allbur-astd  | 0.245  | -0.033 | -0.112 | -0.057 | -0.010 | -0.076 | -0.034 | -0.006 | 0.071  | -0.121 | 0.236  | 0.130  | 0.047  | -0.050 |
| allbur-fmean | -0.028 | 0.100  | 0.049  | -0.046 | 0.063  | 0.202  | 0.161  | 0.224  | 0.438  | 0.136  | -0.062 | 0.145  | -0.181 | -0.043 |
| allbur-fstd  | -0.080 | 0.046  | 0.032  | -0.166 | 0.013  | 0.197  | 0.116  | 0.128  | 0.247  | -0.006 | 0.097  | -0.216 | 0.367  | -0.015 |
| allburstsp-n | 0.129  | -0.109 | 0.056  | 0.341  | -0.169 | 0.077  | 0.065  | 0.154  | -0.046 | 0.012  | -0.047 | 0.004  | -0.022 | -0.028 |
| allburstsp-d | 0.128  | -0.085 | 0.044  | 0.362  | -0.161 | 0.081  | 0.038  | 0.155  | -0.054 | 0.054  | -0.043 | -0.010 | 0.076  | -0.115 |
| allburstss-n | 0.134  | -0.157 | 0.285  | 0.081  | -0.128 | -0.009 | 0.082  | -0.088 | 0.053  | 0.031  | -0.008 | -0.012 | -0.087 | 0.025  |
| day1bu-emean | 0.062  | -0.083 | 0.330  | 0.000  | -0.086 | -0.119 | 0.027  | -0.216 | 0.148  | 0.039  | 0.026  | -0.042 | -0.053 | 0.163  |
| day1bur-estd | 0.060  | -0.010 | 0.190  | -0.149 | 0.074  | -0.028 | 0.104  | -0.185 | -0.010 | 0.103  | 0.132  | -0.147 | 0.266  | -0.295 |
| day1bu-tmean | 0.111  | -0.092 | 0.065  | 0.362  | -0.177 | 0.042  | 0.005  | 0.155  | 0.010  | 0.049  | -0.066 | 0.008  | 0.007  | 0.035  |
| day1bur-tstd | 0.115  | -0.064 | 0.022  | 0.296  | -0.122 | 0.109  | 0.054  | 0.133  | -0.082 | 0.091  | 0.007  | 0.002  | 0.198  | -0.271 |
| day1bu-dmean | 0.102  | -0.120 | 0.296  | 0.132  | -0.139 | -0.083 | 0.015  | -0.112 | 0.141  | 0.055  | -0.015 | -0.007 | -0.025 | 0.134  |
| nightb-emean | 0.132  | -0.009 | 0.151  | -0.231 | 0.021  | 0.301  | -0.088 | 0.025  | -0.155 | -0.070 | -0.001 | -0.029 | -0.059 | 0.074  |
| nightbu-estd | 0.072  | 0.006  | 0.190  | -0.144 | 0.039  | 0.211  | -0.151 | -0.015 | -0.132 | -0.052 | 0.067  | -0.081 | -0.105 | -0.115 |
| nightb-amean | 0.246  | -0.076 | -0.164 | -0.067 | 0.050  | 0.058  | 0.060  | -0.056 | 0.046  | 0.115  | -0.209 | -0.193 | -0.036 | 0.098  |
| nightbu-astd | 0.265  | -0.068 | -0.133 | -0.049 | 0.030  | -0.030 | -0.109 | 0.001  | 0.100  | 0.045  | 0.170  | 0.078  | 0.031  | -0.120 |
| nightb-fmean | -0.021 | 0.103  | 0.059  | -0.021 | 0.053  | 0.194  | 0.148  | 0.224  | 0.433  | 0.133  | -0.067 | 0.175  | -0.214 | -0.019 |
| nightbu-fstd | -0.061 | 0.076  | 0.117  | -0.090 | -0.018 | 0.195  | 0.058  | 0.183  | 0.283  | -0.021 | 0.161  | -0.124 | 0.335  | 0.078  |
| nightb-tmean | 0.140  | 0.006  | 0.099  | -0.070 | -0.036 | 0.352  | -0.090 | 0.104  | -0.186 | -0.133 | 0.087  | 0.036  | 0.061  | 0.230  |
| nightbu-tstd | 0.133  | 0.013  | 0.079  | 0.059  | -0.066 | 0.298  | -0.114 | 0.132  | -0.192 | -0.104 | 0.094  | 0.061  | 0.054  | 0.244  |

|              |        |        |        |        |        |        |        |        |        |        |        |        |        |        |
|--------------|--------|--------|--------|--------|--------|--------|--------|--------|--------|--------|--------|--------|--------|--------|
| nightb-dmean | 0.149  | -0.033 | 0.147  | -0.232 | 0.012  | 0.259  | -0.058 | 0.049  | -0.155 | -0.038 | -0.063 | 0.016  | -0.080 | 0.016  |
| opamax       | 0.274  | -0.075 | -0.153 | -0.040 | 0.033  | -0.024 | -0.020 | -0.031 | 0.090  | 0.030  | -0.043 | -0.081 | 0.000  | -0.016 |
| opamin       | 0.191  | -0.078 | -0.145 | -0.052 | 0.063  | 0.069  | 0.158  | -0.062 | 0.031  | 0.097  | -0.340 | -0.267 | -0.061 | 0.195  |
| opanightam-d | 0.203  | -0.035 | -0.117 | -0.020 | 0.005  | -0.081 | -0.110 | 0.008  | 0.139  | -0.005 | 0.278  | 0.081  | 0.112  | 0.012  |
| opanightde-a | -0.066 | 0.027  | -0.045 | 0.049  | 0.045  | 0.141  | -0.013 | -0.160 | -0.098 | 0.509  | 0.115  | 0.212  | -0.004 | 0.185  |
| opanightde-d | -0.047 | 0.023  | -0.058 | 0.053  | 0.021  | 0.131  | -0.093 | -0.160 | -0.046 | 0.489  | 0.251  | 0.266  | 0.027  | 0.150  |
| opanightno-e | 0.247  | -0.075 | -0.118 | -0.056 | 0.038  | 0.018  | -0.080 | -0.015 | 0.039  | 0.077  | 0.045  | 0.048  | -0.038 | -0.170 |
| opastd       | 0.265  | -0.068 | -0.132 | -0.049 | 0.030  | -0.031 | -0.110 | 0.001  | 0.099  | 0.043  | 0.170  | 0.077  | 0.029  | -0.121 |
| cosinorop-se | -0.017 | -0.013 | 0.091  | 0.030  | -0.018 | -0.151 | 0.030  | 0.219  | 0.082  | -0.331 | 0.137  | 0.126  | -0.061 | 0.130  |
| cosinorop-de | 0.192  | -0.006 | -0.052 | 0.006  | -0.073 | -0.130 | -0.015 | -0.015 | 0.084  | -0.206 | 0.224  | 0.174  | 0.035  | 0.120  |
| cosinoropa-r | 0.253  | -0.068 | -0.126 | -0.023 | 0.006  | -0.066 | 0.044  | -0.005 | 0.091  | -0.051 | -0.072 | -0.013 | 0.006  | 0.159  |
| tojo         | 0.057  | 0.246  | 0.075  | 0.053  | -0.026 | -0.063 | -0.364 | -0.031 | 0.125  | 0.002  | -0.151 | 0.022  | 0.042  | 0.039  |
| std          | 0.089  | 0.311  | -0.035 | -0.039 | -0.241 | 0.012  | 0.104  | -0.043 | -0.041 | -0.011 | 0.056  | -0.062 | -0.113 | -0.082 |
| amplitude    | 0.111  | 0.306  | 0.014  | -0.062 | -0.136 | -0.065 | 0.087  | 0.030  | -0.063 | 0.053  | 0.027  | -0.044 | -0.080 | -0.113 |
| l-tbefore00h | -0.004 | 0.023  | 0.045  | 0.117  | 0.179  | -0.081 | -0.183 | 0.225  | -0.032 | 0.142  | 0.233  | -0.421 | -0.312 | 0.023  |

**eTable 2. Spearman’s Correlation Coefficients (Top Row) and P-Values (Bottom Row)**

Association Tested Between Mean Deviation (MD) Slopes, Age, Baseline MD, Goldmann Mean IOP, and the Contact Lens Sensor-Derived Principal Components

|                    | <b>MD slope (dB/year)</b> | <b>Age (years)</b> | <b>Baseline MD (dB)</b> | <b>Mean GAT IOP</b> |
|--------------------|---------------------------|--------------------|-------------------------|---------------------|
| MD slope (dB/year) | 1.000                     |                    |                         |                     |
|                    |                           |                    |                         |                     |
| Age (years)        | <b>-0.122</b>             | 1.000              |                         |                     |
|                    | <b>0.010</b>              |                    |                         |                     |
|                    |                           |                    |                         |                     |
| Baseline MD (dB)   | <b>0.571</b>              | <b>-0.102</b>      | 1                       |                     |
|                    | <b>0.000</b>              | <b>0.032</b>       |                         |                     |
|                    |                           |                    |                         |                     |
| Mean GAT IOP       | <b>0.128</b>              | -0.079             | <b>0.2359</b>           | 1                   |
|                    | <b>0.007</b>              | 0.097              | <b>&lt;0.001</b>        |                     |
|                    |                           |                    |                         |                     |
| PC1                | 0.034                     | <b>0.125</b>       | 0.0435                  | 0.0409              |
|                    | 0.477                     | <b>0.008</b>       | 0.3603                  | 0.3896              |
|                    |                           |                    |                         |                     |
| PC2                | -0.041                    | 0.006              | 0.022                   | 0.0678              |
|                    | 0.390                     | 0.897              | 0.6432                  | 0.1535              |
|                    |                           |                    |                         |                     |
| PC3                | -0.025                    | <b>-0.170</b>      | -0.063                  | <b>-0.116</b>       |
|                    | 0.607                     | <b>&lt;0.001</b>   | 0.1874                  | <b>0.0147</b>       |
|                    |                           |                    |                         |                     |
| PC4                | -0.038                    | <b>0.096</b>       | 0.0147                  | 0.0019              |
|                    | 0.419                     | <b>0.044</b>       | 0.7579                  | 0.9682              |
|                    |                           |                    |                         |                     |
| PC5                | -0.065                    | <b>0.134</b>       | <b>-0.11</b>            | 0.0053              |
|                    | 0.172                     | <b>0.005</b>       | <b>0.020</b>            | 0.9121              |
|                    |                           |                    |                         |                     |
| PC6                | <b>0.095</b>              | 0.088              | 0.0304                  | 0.0353              |
|                    | <b>0.045</b>              | 0.063              | 0.5222                  | 0.4586              |
|                    |                           |                    |                         |                     |
| PC7                | -0.002                    | <b>-0.136</b>      | -0.024                  | -0.016              |
|                    | 0.964                     | <b>0.004</b>       | 0.6119                  | 0.7434              |
|                    |                           |                    |                         |                     |

|      |        |               |        |               |
|------|--------|---------------|--------|---------------|
| PC8  | -0.070 | -0.034        | -0.028 | <b>0.1116</b> |
|      | 0.143  | 0.476         | 0.5532 | <b>0.0187</b> |
|      |        |               |        |               |
| PC9  | 0.031  | -0.030        | 0.0215 | 0.0319        |
|      | 0.516  | 0.533         | 0.6507 | 0.503         |
|      |        |               |        |               |
| PC10 | -0.084 | -0.036        | -0.089 | <b>0.1271</b> |
|      | 0.076  | 0.444         | 0.0603 | <b>0.0073</b> |
|      |        |               |        |               |
| PC11 | 0.004  | <b>0.162</b>  | -0.034 | -0.047        |
|      | 0.932  | <b>0.001</b>  | 0.4793 | 0.3258        |
|      |        |               |        |               |
| PC12 | 0.060  | <b>-0.103</b> | -0.041 | -0.01         |
|      | 0.207  | <b>0.030</b>  | 0.3882 | 0.8424        |
|      |        |               |        |               |
| PC13 | -0.014 | 0.000         | -0.054 | -0.088        |
|      | 0.770  | 0.993         | 0.2564 | 0.0656        |
|      |        |               |        |               |
| PC14 | -0.082 | -0.013        | -0.083 | -0.039        |
|      | 0.085  | 0.784         | 0.080  | 0.415         |

**eTable 3. Multivariable Linear Regression Analysis of Mean Goldmann Intraocular Pressure and Covariates.**

The dependent variable is the mean deviation (MD) slope in dB/year.

|                      | <b>β</b> | <b>95% Confidence Interval</b> |        | <b>P-value</b> |
|----------------------|----------|--------------------------------|--------|----------------|
| Mean IOP (per mmHg)  | -0.004   | -0.018                         | 0.009  | 0.502          |
| Age (per decade)     | -0.020   | -0.055                         | 0.016  | 0.284          |
| Baseline MD (per dB) | 0.036    | 0.030                          | 0.042  | <0.001         |
| Laser                | -0.053   | -0.146                         | 0.040  | 0.265          |
| Medications          | -0.031   | -0.052                         | -0.009 | 0.006          |
| Surgery              | 0.025    | -0.059                         | 0.110  | 0.559          |

\*Akaike information criterion= 517.3; Adjusted R-squared= 27.8%



**eTable 4. Univariable Linear Regression Analysis of Individual Principal Components (PCs) Derived From Contact Lens Sensor Parameters.**

The dependent variable is the mean deviation (MD) slope in dB/year.

|             | $\beta$      | 95% Confidence Interval |              | P-value      |
|-------------|--------------|-------------------------|--------------|--------------|
| PC1         | 0.01         | -0.01                   | 0.02         | 0.404        |
| PC2         | 0.00         | -0.02                   | 0.02         | 0.743        |
| PC3         | -0.01        | -0.03                   | 0.01         | 0.574        |
| PC4         | -0.01        | -0.04                   | 0.01         | 0.313        |
| PC5         | -0.01        | -0.04                   | 0.01         | 0.331        |
| <b>PC6</b>  | <b>0.03</b>  | <b>0.00</b>             | <b>0.05</b>  | <b>0.055</b> |
| PC7         | -0.01        | -0.04                   | 0.02         | 0.629        |
| <b>PC8</b>  | <b>-0.02</b> | <b>-0.05</b>            | <b>0.01</b>  | <b>0.195</b> |
| PC9         | 0.02         | -0.02                   | 0.05         | 0.295        |
| <b>PC10</b> | <b>-0.04</b> | <b>-0.07</b>            | <b>-0.01</b> | <b>0.022</b> |
| PC11        | 0.00         | -0.04                   | 0.04         | 0.945        |
| <b>PC12</b> | <b>0.03</b>  | <b>-0.01</b>            | <b>0.07</b>  | <b>0.165</b> |
| PC13        | 0.02         | -0.03                   | 0.07         | 0.379        |
| <b>PC14</b> | <b>-0.04</b> | <b>-0.09</b>            | <b>0.00</b>  | <b>0.066</b> |

Values in bold type face represent  $P < 0.20$ .

**eTable 5. Multivariable Linear Regression Analysis With Stepwise Backward Selection of Principal Components Derived From Contact Lens Parameters (P<0.20 in Univariable Models) and the Set of Covariates.**

The dependent variable is the mean deviation (MD) slope in dB/year. The covariates laser, surgery, medications, age, and baseline MD are set as locked terms.

|                      | $\beta$ | 95% Confidence Interval |        | P-value |
|----------------------|---------|-------------------------|--------|---------|
| PC6                  | 0.023   | 0.001                   | 0.045  | 0.041   |
| Age (per decade)     | -0.023  | -0.058                  | 0.013  | 0.216   |
| Baseline MD (per dB) | 0.035   | 0.029                   | 0.041  | <0.001* |
| Laser                | -0.044  | -0.136                  | 0.049  | 0.355   |
| Medications          | -0.031  | -0.053                  | -0.010 | 0.004*  |
| Surgery              | 0.021   | -0.063                  | 0.105  | 0.624   |

Akaike information criterion = 513.5; Adjusted R-squared= 28.4%

\*Significant after Benjamini-Hochberg Procedure

**eTable 6. Multivariable Linear Regression Analysis With Covariates Included as Confounders.**  
 The dependent variable is a binary classification of fast progression based upon a mean deviation slope faster than -1.0 dB/year.

|                      | <b>Odds Ratio</b> | <b>95% Confidence Interval</b> |       | <b>P-value</b> |
|----------------------|-------------------|--------------------------------|-------|----------------|
| Age (per decade)     | 1.023             | 0.763                          | 1.371 | 0.879          |
| Baseline MD (per dB) | 0.861             | 0.823                          | 0.900 | <0.001         |
| Laser                | 1.350             | 0.761                          | 2.394 | 0.304          |
| Medications          | 1.110             | 0.947                          | 1.302 | 0.197          |
| Surgery              | 1.235             | 0.717                          | 2.128 | 0.446          |

\*Akaike information criterion = 263.8; Pseudo R-squared= 21.5%

**eTable 7. Univariable Linear Regression Analysis of Individual Contact Lens Sensor Parameters (N=55).**

The dependent variable is a binary classification of fast progression based upon a mean deviation slope faster than -1.0 dB/year.

|                                                    | <b>Odds Ratio</b> | <b>95% Confidence Interval</b> |              | <b>P-value</b> |
|----------------------------------------------------|-------------------|--------------------------------|--------------|----------------|
| All bursts amplitude mean (per unit)               | 1.121             | 0.600                          | 2.095        | 0.719          |
| <b>All bursts amplitude std (per 0.1 units)</b>    | <b>1.059</b>      | <b>0.974</b>                   | <b>1.152</b> | <b>0.173</b>   |
| All bursts opa mean (per 0.01 units)               | 0.979             | 0.890                          | 1.077        | 0.673          |
| All bursts opa std (per 0.01 units)                | 0.892             | 0.693                          | 1.147        | 0.374          |
| All bursts opf mean (per 10 units)                 | 1.014             | 0.723                          | 1.423        | 0.933          |
| <b>All bursts opf std (per unit)</b>               | <b>0.814</b>      | <b>0.692</b>                   | <b>0.958</b> | <b>0.014</b>   |
| All bursts peak count mean (per unit)              | 0.982             | 0.910                          | 1.059        | 0.646          |
| All bursts peak count std (per unit)               | 1.016             | 0.924                          | 1.117        | 0.732          |
| All bursts std mean (per 0.1 units)                | 1.014             | 0.667                          | 1.541        | 0.948          |
| Amplitude (per 100 units)                          | 1.116             | 0.892                          | 1.396        | 0.335          |
| Amplitude of the cosinecurve (per 100 units)       | 1.036             | 0.633                          | 1.695        | 0.886          |
| Auc sleep (per 10 units)                           | 1.022             | 0.939                          | 1.114        | 0.604          |
| Cosinor opa acrophase (per 0.1 units)              | 0.973             | 0.873                          | 1.084        | 0.627          |
| Cosinor opa amplitude (per 0.01 units)             | 0.967             | 0.832                          | 1.125        | 0.671          |
| Cosinor opa mesor (per 0.01 units)                 | 0.973             | 0.887                          | 1.067        | 0.570          |
| Day1 bursts amplitude mean (per unit)              | 1.213             | 0.823                          | 1.789        | 0.328          |
| Day1 bursts amplitude std (per unit)               | 1.193             | 0.531                          | 2.683        | 0.668          |
| Day1 bursts peak count mean (per unit)             | 1.022             | 0.975                          | 1.070        | 0.354          |
| Day1 bursts peak count std (per unit)              | 1.030             | 0.917                          | 1.156        | 0.616          |
| Day1 bursts std mean (per 0.1 units)               | 1.140             | 0.884                          | 1.471        | 0.310          |
| Level sleep start (per 100 units)                  | 1.176             | 0.675                          | 2.050        | 0.566          |
| Mean peak ratio 24hour (per 10 units)              | 1.041             | 0.905                          | 1.198        | 0.566          |
| Mean peak ratio sleep (per 10 units)               | 0.911             | 0.792                          | 1.050        | 0.200          |
| <b>Mean peak ratio wake (per 10 units)</b>         | <b>1.077</b>      | <b>0.964</b>                   | <b>1.203</b> | <b>0.188</b>   |
| <b>Number of brief peaks 24hour (per unit)</b>     | <b>1.155</b>      | <b>0.955</b>                   | <b>1.397</b> | <b>0.136</b>   |
| Number of brief peaks sleep (per unit)             | 1.060             | 0.747                          | 1.504        | 0.742          |
| <b>Number of brief peaks wake (per unit)</b>       | <b>1.238</b>      | <b>0.993</b>                   | <b>1.544</b> | <b>0.057</b>   |
| <b>Night bursts amplitude mean (per 0.1 units)</b> | <b>0.905</b>      | <b>0.785</b>                   | <b>1.044</b> | <b>0.175</b>   |
| Night bursts amplitude std (per unit)              | 0.831             | 0.349                          | 1.980        | 0.678          |
| Night bursts opa mean (per 0.01 units)             | 0.985             | 0.901                          | 1.076        | 0.744          |
| Night bursts opa std (per 0.1 units)               | 0.101             | 0.002                          | 4.109        | 0.225          |
| Night bursts opf mean (per 10 units)               | 1.047             | 0.750                          | 1.461        | 0.785          |
| <b>Night bursts opf std (per unit)</b>             | <b>0.856</b>      | <b>0.706</b>                   | <b>1.036</b> | <b>0.112</b>   |
| <b>Night bursts peak count mean (per unit)</b>     | <b>0.753</b>      | <b>0.493</b>                   | <b>1.150</b> | <b>0.190</b>   |

|                                                      |              |              |              |              |
|------------------------------------------------------|--------------|--------------|--------------|--------------|
| Night bursts peak count std (per unit)               | 0.955        | 0.787        | 1.159        | 0.645        |
| <b>Night bursts std mean (per 0.01 units)</b>        | <b>0.937</b> | <b>0.857</b> | <b>1.024</b> | <b>0.155</b> |
| Number of long peaks 24hour (per unit)               | 0.949        | 0.870        | 1.036        | 0.248        |
| Number of long peaks sleep (per unit)                | 0.919        | 0.734        | 1.150        | 0.462        |
| Number of brief peaks wake (per unit)                | 0.937        | 0.838        | 1.048        | 0.261        |
| Opa max (per 0.01 units)                             | 0.981        | 0.928        | 1.037        | 0.499        |
| Opa min (per 0.01 units)                             | 1.003        | 0.880        | 1.144        | 0.955        |
| Opa night amplitude smoothed (per 0.1 units)         | 0.711        | 0.205        | 2.463        | 0.591        |
| <b>Opa night delta (per 0.1 units)</b>               | <b>1.607</b> | <b>0.852</b> | <b>3.033</b> | <b>0.142</b> |
| Opa night delta smoothed (per 0.1 units)             | 1.412        | 0.586        | 3.397        | 0.441        |
| <b>Opa night noise (per 0.01 units)</b>              | <b>0.710</b> | <b>0.442</b> | <b>1.139</b> | <b>0.156</b> |
| Opa std (per 0.01 units)                             | 0.797        | 0.550        | 1.154        | 0.231        |
| Std (per 100 units)                                  | 1.125        | 0.552        | 2.290        | 0.745        |
| Tojo (per 100 units)                                 | 0.914        | 0.678        | 1.233        | 0.559        |
| Variability from mean 24hour (per 100 units)         | 0.954        | 0.435        | 2.091        | 0.908        |
| Variability from mean sleep (per 100 units)          | 0.832        | 0.240        | 2.885        | 0.773        |
| Variability from mean wake (per 100 units)           | 1.505        | 0.756        | 2.996        | 0.244        |
| <b>Variability from smooth 24hour (per 10 units)</b> | <b>1.978</b> | <b>0.957</b> | <b>4.085</b> | <b>0.065</b> |
| Variability from smooth sleep (per 10 units)         | 0.698        | 0.296        | 1.642        | 0.411        |
| <b>Variability from smooth wake (per 10 units)</b>   | <b>2.002</b> | <b>1.164</b> | <b>3.443</b> | <b>0.012</b> |
| Wake-to-sleep slope (per 100 units)                  | 0.842        | 0.454        | 1.563        | 0.588        |

Values in bold type face represent  $P < 0.20$ .

**eTable 8. Multivariable Logistic Regression Analysis With Stepwise Backward Selection of Contact Lens Parameters (P<0.20 in Univariable Models) and the Set of Covariates.**

The dependent variable is a binary classification of fast progression based upon a mean deviation slope faster than -1.0 dB/year. The covariates laser, surgery, medications, age, and baseline mean deviation (MD) are set as locked terms.

|                                             | <b>Odds Ratio</b> | <b>95% Confidence Interval</b> |       | <b>P-value</b> |
|---------------------------------------------|-------------------|--------------------------------|-------|----------------|
| Variability from smooth wake (per 10 units) | 2.142             | 1.130                          | 4.060 | 0.019*         |
| All bursts opf std (per unit)               | 0.812             | 0.675                          | 0.978 | 0.028          |
| Age (per decade)                            | 1.046             | 0.776                          | 1.409 | 0.766          |
| Baseline MD (per dB)                        | 0.859             | 0.820                          | 0.899 | <0.001*        |
| Laser                                       | 1.282             | 0.721                          | 2.279 | 0.397          |
| Medications                                 | 1.092             | 0.933                          | 1.277 | 0.274          |
| Surgery                                     | 1.400             | 0.807                          | 2.428 | 0.231          |

Akaike information criterion =256.5; Pseudo R-squared= 25.0%

\*Significant after Benjamini-Hochberg Procedure

**eTable 9. Multivariable Logistic Regression Analysis With Mean Goldmann Intraocular Pressure and the Set of Covariates.**

The dependent variable is a binary classification of fast progression based upon a mean deviation slope faster than -1.0 dB/year.

|                      | <b>Odds Ratio</b> | <b>95% Confidence Interval</b> |       | <b>P-value</b> |
|----------------------|-------------------|--------------------------------|-------|----------------|
| Mean IOP (mmHg)      | 1.016             | 0.915                          | 1.130 | 0.762          |
| Laser                | 1.355             | 0.763                          | 2.404 | 0.300          |
| Surgery              | 1.253             | 0.722                          | 2.172 | 0.423          |
| Medications          | 1.103             | 0.936                          | 1.299 | 0.241          |
| Age (per decade)     | 1.024             | 0.763                          | 1.373 | 0.877          |
| Baseline MD (per dB) | 0.860             | 0.822                          | 0.899 | <0.001*        |

Akaike information criterion = 265.6; Pseudo R-squared= 21.5%

\*Significant after Benjamini-Hochberg Procedure

**eTable 10. Univariable Logistic Regression Analysis With Each Principal Component Derived From the Contact Lens Parameters.**

The dependent variable is a binary classification of fast progression based upon a mean deviation slope faster than -1.0 dB/year.

|             | <b>Odds Ratio</b> | <b>95% Confidence Interval</b> |             | <b>P-value</b> |
|-------------|-------------------|--------------------------------|-------------|----------------|
| PC1         | 0.98              | 0.89                           | 1.08        | 0.74           |
| PC2         | 1.02              | 0.91                           | 1.15        | 0.61           |
| PC3         | 1.05              | 0.93                           | 1.19        | 0.36           |
| PC4         | 1.04              | 0.90                           | 1.20        | 0.53           |
| PC5         | 0.98              | 0.85                           | 1.13        | 0.83           |
| <b>PC6</b>  | <b>1.21</b>       | <b>1.02</b>                    | <b>1.43</b> | <b>0.02</b>    |
| PC7         | 1.11              | 0.93                           | 1.32        | 0.23           |
| PC8         | 1.03              | 0.84                           | 1.25        | 0.75           |
| <b>PC9</b>  | <b>1.14</b>       | <b>0.93</b>                    | <b>1.40</b> | <b>0.19</b>    |
| <b>PC10</b> | <b>1.32</b>       | <b>1.06</b>                    | <b>1.65</b> | <b>0.01</b>    |
| PC11        | 0.95              | 0.74                           | 1.23        | 0.74           |
| PC12        | 1.02              | 0.79                           | 1.33        | 0.84           |
| PC13        | 0.88              | 0.67                           | 1.17        | 0.41           |
| <b>PC14</b> | <b>1.25</b>       | <b>0.93</b>                    | <b>1.68</b> | <b>0.13</b>    |

Values in bold type face represent P<0.20.



**eTable 11. Multivariable logistic Regression Analysis With Stepwise Backward Selection of Principal Components Derived From the Contact Lens Parameters (P<0.20 in Univariable Models) and the Set of Covariates.**

The dependent variable is a binary classification of fast progression based upon a mean deviation slope faster than -1.0 dB/year. The covariates laser, surgery, medications, age, and baseline MD are set as locked terms.

|                      | <b>Odds Ratio</b> | <b>95% Confidence Interval</b> |       | <b>P-value</b> |
|----------------------|-------------------|--------------------------------|-------|----------------|
| PC6                  | 0.761             | 0.621                          | 0.934 | 0.009*         |
| PC10                 | 1.389             | 1.076                          | 1.792 | 0.012*         |
| Age (per decade)     | 1.076             | 0.791                          | 1.464 | 0.640          |
| Baseline MD (per dB) | 0.856             | 0.817                          | 0.897 | <0.001         |
| Laser                | 1.344             | 0.752                          | 2.401 | 0.318          |
| Medications          | 1.074             | 0.913                          | 1.262 | 0.388          |
| Surgery              | 1.385             | 0.790                          | 2.431 | 0.256          |

Akaike information criterion = 254.6; Pseudo R-squared= 25.6%

\*Significant after Benjamini-Hochberg Procedure
